# Supplementary material for: Functional Insight into and Refinement of the Genomic Boundaries of the JARID2-Neurodevelopmental Disorder Episignature
Source: Int J Mol Sci. 2023 Sep 18;24(18):14240. doi: 10.3390/ijms241814240 (PMC10531903; doi:10.3390/ijms241814240)
Supplement: Supplementary file 1 [file ijms-24-14240-s001.zip › Supplemtary tables.xlsx]

## Sheet: S1 variants
Patient # in Verbene et al.	1	2	3	4	5	6	7	8	9	10	11
Variant type	Deletion	Deletion	Deletion	Frameshift	Splice site	Deletion	Deletion	Deletion	Missense	Missense	Missense
Variant	6p22.3(15291644_15388348)x1	6p22.3(15330889_15419256)x1	6p22.3(15374392_15405436)x1	c.2866dupG, p.(Glu956GlyfsTer72)	c.2731+1G>C	6p22.3(15383717_15462037)x1	6p22.3(15383717_15462037)x1	del exon 6-18*	c.2363G>A; p.(Arg788Gln)	c.1930G>A, p.(Glu644Lys)	c.2363G>A; p.(Arg788Gln)
Inheritance	de novo	de novo	de novo	de novo	de novo	maternal	NA	not maternal	de novo	de novo	Inherited from apparently unaffected parent
Klasse	Pathogenic	Pathogenic	Pathogenic	Pathogenic	Likely pathogenic	Pathogenic	Pathogenic	Pathogenic	VUS	VUS	VUS
Patient 1, 2, 3, 4, 6 and 7 are analyzed with array ,techniques and the notation arr[GRCH37]6p22.3 is used.
* Exact position is not known. † Mother apparently unaffected.
Newly added Patients #	1	2	3	4	5
Variant type	Deletion	Deletion	Deletion	Deletion	Frameshift
Variant	6p22.3 (14571015-16248244)x1	6p22.3 (14571015-16381865)x1	6p24.2-p22.3(11327614-15291611)x1	6p24.3-22.3 (9796651-19501625)x1	c.1400_1425del, p.(Ala467Glyfs*48)
Inheritance	Not present in their siblings, parents deceased	de novo	de novo	de novo	de novo
Klasse	Likely pathogenic	Pathogenic	Pathogenic	Pathogenic	Pathogenic
Patient 1, 2, 3 and 4 are analyzed with array ,techniques and the notation arr[GRCH37]6p22.3 is used.
Variants based on NM_004973.4.

## Sheet: S2 DMPs 
Probe	Methylation % difference	p value	Adjusted p value	chromosome	position	UCSC Gene name(s)	UCSC gene type(s)	UCSC CpG island
cg05953373	-13.3426	4.24975e-09	0.000181725	16	89023633	CBFA2T3	Body
cg03310838	-11.759	3.84578e-09	0.000181725	16	88545042	ZFPM1	Body
cg22486834	-10.0763	4.0256e-09	0.000181725	6	52859107	GSTA4	5'UTR	chr6:52859565-52859767
cg25481160	-6.57317	4.69183e-08	0.00107002	3	71111489	FOXP1	Body	chr3:71113896-71114102
cg26707709	15.9885	1.13228e-07	0.00196008	2	241975756	SNED1	Body	chr2:241975533-241976318
cg20426710	-8.96494	1.14594e-07	0.00196008	22	50248907	ZBED4	5'UTR	chr22:50250160-50250513
cg01055824	-8.83514	1.62759e-07	0.00247459	14	91818668	CCDC88C	Body
cg07416187	-7.63395	3.56327e-07	0.0039966	2	193373742
cg11732190	-6.82607	4.16381e-07	0.00452191	3	9989042	PRRT3;PRRT3-AS1	Body;TSS200	chr3:9987895-9989619
cg07944420	-14.1237	5.05839e-07	0.00493141	16	89185293	ACSF3;ACSF3;ACSF3	Body;Body;Body	chr16:89186198-89186551
cg06321596	-8.05833	5.11059e-07	0.00493141	16	17562960	XYLT1	Body
cg03602288	-8.28913	6.31361e-07	0.00560995	17	46641863	HOXB3	5'UTR	chr17:46641534-46642110
cg03166236	-5.46149	6.27586e-07	0.00560995	2	7062351	RNF144A	5'UTR	chr2:7057530-7058433
cg20018057	-6.09206	7.38385e-07	0.0061094	20	57465139	GNAS;GNAS;GNAS;GNAS;GNAS;GNAS;GNAS	3'UTR;TSS1500;Body;TSS1500;3'UTR;TSS1500;Body	chr20:57463652-57467739
cg16779839	-9.38966	7.60841e-07	0.00612416	17	79374327	BAHCC1	Body	chr17:79366806-79374742
cg02691035	-8.7733	8.47276e-07	0.00643363	16	89163800	ACSF3;ACSF3;ACSF3	Body;5'UTR;5'UTR	chr16:89167116-89167482
cg15841711	-7.10175	1.13232e-06	0.00767044	2	12964957
cg05229662	-6.30584	1.15996e-06	0.00778064	3	99043818
cg21149269	-6.78589	1.22233e-06	0.00804133	1	25324171
cg12276019	9.72187	1.33987e-06	0.00867688	8	11057947	XKR6	Body	chr8:11057684-11058479
cg15137213	-8.91597	1.34431e-06	0.00867688	17	585596	VPS53;VPS53	Body;Body
cg24879782	5.44872	1.6035e-06	0.00964703	2	19561482			chr2:19560963-19561650
cg08172479	-8.21969	2.01417e-06	0.010855	16	16951653
cg18158306	-6.71686	2.0218e-06	0.010855	12	133135032	FBRSL1	Body	chr12:133135293-133135722
cg07554924	-6.13288	2.04474e-06	0.010855	9	75060151
cg14909179	-12.9355	2.30138e-06	0.0108852	11	882687	CHID1;CHID1;CHID1;CHID1;CHID1	Body;Body;Body;Body;Body	chr11:881368-881666
cg21629528	-8.31477	2.1191e-06	0.0108852	7	130131921	MEST;MEST;MEST;MESTIT1	5'UTR;TSS200;5'UTR;TSS1500	chr7:130130739-130133111
cg09825979	-7.52459	2.20555e-06	0.0108852	7	27179432			chr7:27179062-27179511
cg13761321	-6.69746	2.42239e-06	0.0111232	9	97768771	C9orf3	Body	chr9:97766649-97767955
cg04346672	8.57817	2.44626e-06	0.0111579	14	69229910
cg03987786	5.16555	2.46795e-06	0.0111823	17	8264387	LOC100128288	TSS1500
cg20184247	-8.46888	2.69e-06	0.0118105	17	46672052	LOC404266;LOC404266;LOC404266;HOXB5;LOC404266;LOC404266	Body;Body;Body;TSS1500;TSS1500;Body	chr17:46673532-46674181
cg05272827	-7.39813	2.70951e-06	0.0118105	17	79380706	BAHCC1	Body	chr17:79380359-79380723
cg20918563	-7.89055	2.95185e-06	0.0123902	3	196263520
cg06057569	-10.0263	3.19401e-06	0.0128546	22	50219754	BRD1	TSS1500	chr22:50220118-50220822
cg17890044	-6.90292	3.41548e-06	0.0131547	1	2994372	PRDM16;PRDM16	Body;Body	chr1:2997272-2997473
cg24009731	6.86792	3.66661e-06	0.0135255	20	19983895
cg10080728	-7.46731	3.81397e-06	0.0135635	17	79949717	ASPSCR1	Body	chr17:79952141-79952494
cg05651442	-9.03479	4.24712e-06	0.0141058	12	52347030	ACVR1B;ACVR1B;ACVR1B	TSS200;Body;Body	chr12:52345531-52345903
cg17662369	-6.87109	4.22921e-06	0.0141058	5	179333958	TBC1D9B;TBC1D9B	Body;Body	chr5:179334344-179335115
cg02843755	-6.06189	4.46677e-06	0.0144838	3	37902570	CTDSPL;CTDSPL	TSS1500;TSS1500	chr3:37901938-37904039
cg15672022	-9.7632	4.91189e-06	0.0153453	5	141805772
cg22953960	9.93455	5.00536e-06	0.0155663	10	22766081			chr10:22764708-22767050
cg22118521	-5.0787	5.48404e-06	0.0164565	5	50482124
cg04252928	-14.4009	6.86116e-06	0.0189285	16	89168599	ACSF3;ACSF3;ACSF3	Body;Body;Body	chr16:89167116-89167482
cg26868156	-8.96529	6.90954e-06	0.0189855	11	1892180	LSP1;LSP1;LSP1;LSP1;LSP1;LSP1	5'UTR;1stExon;5'UTR;Body;1stExon;5'UTR	chr11:1892037-1892556
cg15195495	-9.98173	7.01579e-06	0.0190453	19	681420	FSTL3	Body	chr19:681345-681576
cg09026568	-7.86282	7.06547e-06	0.0190453	22	50625225	TRABD	5'UTR	chr22:50623164-50625226
cg16779811	-5.13924	7.42311e-06	0.0194927	8	615409	ERICH1	Body	chr8:615143-615352
cg16882623	7.15249	7.97136e-06	0.0197105	3	149501115	ANKUB1	Body
cg10831285	-9.6724	8.4476e-06	0.0200684	19	17918927	B3GNT3	Body	chr19:17918737-17919098
cg22961459	-5.81371	8.69501e-06	0.0205137	12	54763433	ZNF385A;ZNF385A;ZNF385A	3'UTR;3'UTR;3'UTR	chr12:54764065-54764510
cg06207091	-7.75753	9.81142e-06	0.0218079	14	40231999
cg11223753	-7.56391	1.01285e-05	0.0220054	22	47525730	TBC1D22A;TBC1D22A;TBC1D22A;TBC1D22A;TBC1D22A	Body;Body;Body;Body;Body
cg12397924	-5.25911	1.23659e-05	0.024173	7	94287186	PEG10;PEG10	5'UTR;5'UTR	chr7:94284858-94286527
cg08215400	-7.13704	1.27272e-05	0.024331	12	7592407	CD163L1	Body	chr12:7592406-7593030
cg22132509	5.56601	1.29771e-05	0.024331	3	160475102	PPM1L	Body	chr3:160472310-160474487
cg00551609	-7.61717	1.36272e-05	0.0243732	2	74214662			chr2:74211214-74212314
cg15648792	-5.72098	1.36386e-05	0.0243732	18	11146255	FAM38B	Body	chr18:11148307-11149936
cg12432568	-7.59946	1.4594e-05	0.0251934	13	113659625	MCF2L;MCF2L	Body;Body	chr13:113663201-113663539
cg11279358	-6.16478	1.48874e-05	0.0253883	21	33027796			chr21:33031734-33032657
cg09892273	-7.52979	1.56394e-05	0.0257837	12	85307424	SLC6A15;SLC6A15;SLC6A15	TSS1500;TSS1500;TSS1500	chr12:85305663-85305876
cg22075979	-7.15362	1.61332e-05	0.0260168	5	144558502
cg13209980	-5.89559	1.6463e-05	0.0261946	1	157995040	KIRREL	Body
cg03472880	-7.34095	1.65378e-05	0.0262519	2	176931003			chr2:176931575-176932663
cg13636698	-12.1432	1.74023e-05	0.0265766	8	127569019	FAM84B	Body	chr8:127568676-127570873
cg11903133	6.07143	1.73396e-05	0.0265766	20	50722613	ZFP64	Body	chr20:50721310-50721912
cg17815092	-6.04716	1.83456e-05	0.0274174	22	19108900	DGCR2;DGCR2;DGCR2;DGCR2;DGCR2	Body;Body;Body;Body;Body	chr22:19109068-19110329
cg23715045	-6.91752	1.95026e-05	0.0285113	11	124621944	VSIG2	Body
cg20884524	-7.30237	2.01352e-05	0.0288593	6	76108836	FILIP1;FILIP1;FILIP1;LOC101928540	Body;Body;Body;Body
cg03159676	-5.85232	2.05898e-05	0.029199	16	85600536
cg08284931	-8.3172	2.11803e-05	0.0294605	1	116385108	NHLH2	TSS1500	chr1:116380359-116382364
cg05829145	-6.08079	2.28345e-05	0.0301602	8	143279882	NCRNA00051	Body
cg06690050	-6.84808	2.29587e-05	0.030185	19	13917949	ZSWIM4	Body	chr19:13919665-13920076
cg13812657	-5.6086	2.31221e-05	0.030185	12	56124760	CD63	TSS1500	chr12:56122017-56123186
cg23089177	-6.39145	2.37313e-05	0.0304119	7	30196932	MTURN	Body
cg12759554	-5.404	2.41702e-05	0.0306645	4	89618637	NAP1L5;HERC3	1stExon;Body
cg27580914	-6.87076	2.46816e-05	0.0306801	2	235903101	SH3BP4	5'UTR
cg03590031	-6.02528	2.47976e-05	0.0306801	20	62200285	PRIC285;PRIC285	Body;TSS1500	chr20:62200085-62200320
cg13692655	-5.54281	2.46395e-05	0.0306801	9	130713088	FAM102A;FAM102A	TSS200;Body
cg14058329	-8.26332	2.7266e-05	0.0319594	7	27183946	HOXA5	TSS1500	chr7:27182613-27185562
cg17319486	-7.86411	2.92957e-05	0.033295	18	35147056	BRUNOL4;BRUNOL4;BRUNOL4;BRUNOL4	TSS1500;TSS1500;TSS1500;TSS1500	chr18:35144907-35147628
cg12440187	-9.07424	3.21028e-05	0.0342865	6	30510300	GNL1	3'UTR
cg01102220	7.2351	3.14561e-05	0.0342865	14	25454626	STXBP6;STXBP6;STXBP6	5'UTR;5'UTR;5'UTR
cg13006424	-7.57863	3.26864e-05	0.0345115	2	98377939	TMEM131	Body
cg18919541	-7.3725	3.31974e-05	0.0347112	12	121530737			chr12:121533571-121533923
cg04640109	5.82216	3.31795e-05	0.0347112	8	106330173	ZFPM2	TSS1500	chr8:106330518-106332120
cg19320294	-5.65583	3.32965e-05	0.0347269	1	150229871	CA14	TSS1500
cg10642175	-7.48987	3.40361e-05	0.0347297	14	91862874	CCDC88C	Body
cg13660174	-7.4503	3.38106e-05	0.0347297	9	136238392	SURF4	Body	chr9:136242306-136243549
cg26816636	-5.04545	3.38858e-05	0.0347297	5	179495386	RNF130	Body	chr5:179498291-179499338
cg20782724	-5.80229	3.53633e-05	0.0348237	7	47518657	TNS3	5'UTR
cg23788201	5.41411	3.52055e-05	0.0348237	3	151985732	MBNL1-AS1;MBNL1-AS1;MBNL1;MBNL1	Body;Body;TSS200;TSS200	chr3:151986327-151987325
cg13839439	-5.55742	3.5789e-05	0.0348928	12	54144521			chr12:54144562-54145470
cg23994864	-8.35553	3.6799e-05	0.0351637	11	41415790	LRRC4C;LRRC4C	5'UTR;5'UTR
cg11537298	-7.25923	3.74216e-05	0.035418	17	80984285	B3GNTL1	Body	chr17:80983038-80983563
cg23648347	-5.60619	3.78347e-05	0.0356064	15	91447241	MAN2A2	TSS200	chr15:91445563-91446768
cg24005743	-5.27886	3.85852e-05	0.0357838	11	32112810	RCN1	1stExon	chr11:32112394-32113277
cg13154443	7.64267	3.9516e-05	0.0359322	8	58906720	FAM110B	TSS1500	chr8:58907001-58907822
cg03503934	-7.3314	3.92694e-05	0.0359322	18	57814763
cg06386478	8.58475	4.11057e-05	0.0364227	8	19460136	CSGALNACT1;CSGALNACT1;CSGALNACT1	TSS200;Body;5'UTR	chr8:19459905-19460137
cg08274544	-9.96261	4.20877e-05	0.0366824	14	88946041	PTPN21	Body	chr14:88945186-88946537
cg09057094	-5.99901	4.25435e-05	0.0368449	1	215259745	KCNK2;KCNK2;KCNK2	Body;Body;Body	chr1:215256051-215256636
cg17399727	-5.29248	4.32568e-05	0.0370497	3	48622078	COL7A1	Body
cg20966754	-11.5537	4.61438e-05	0.0379119	17	47091339	IGF2BP1;IGF2BP1	Body;Body	chr17:47091037-47091567
cg21148531	-6.83019	4.61086e-05	0.0379119	6	106774172	ATG5	TSS1500	chr6:106773187-106773803
cg03345232	-5.8509	4.62638e-05	0.0379119	14	92981121	RIN3	Body	chr14:92979726-92981228
cg01687862	-5.72354	4.68004e-05	0.0379678	7	75814979
cg04344111	13.7998	4.83482e-05	0.0384664	20	19984506
cg12640822	-5.17222	4.83513e-05	0.0384664	22	23799750			chr22:23802501-23802934
cg14284554	-6.56916	5.08378e-05	0.0390812	1	206810354	DYRK3;DYRK3	Body;Body	chr1:206808523-206809187
cg04147039	-7.36921	5.21095e-05	0.0395259	6	170785657			chr6:170787749-170787985
cg20510084	-6.50029	5.28245e-05	0.039716	17	80982156	B3GNTL1	Body	chr17:80983038-80983563
cg16544989	-6.65477	5.38964e-05	0.0399427	16	85600639
cg26152038	-5.64562	5.39177e-05	0.0399427	1	146543596			chr1:146543987-146544439
cg00235508	-5.04121	5.40339e-05	0.0399427	17	79439311
cg23251761	-10.5758	5.57014e-05	0.0403032	1	9750061	PIK3CD	5'UTR	chr1:9749295-9750228
cg02548132	-8.09385	5.75272e-05	0.0405624	8	6420242	ANGPT2;ANGPT2;ANGPT2;MCPH1	1stExon;1stExon;1stExon;Body	chr8:6424215-6424888
cg00002837	6.50907	6.11004e-05	0.0416787	1	44513358
cg23989012	-6.40668	6.56242e-05	0.0428035	1	147791203			chr1:147789652-147790094
cg24119717	-6.46168	6.72821e-05	0.0428855	5	139488731			chr5:139486931-139487672
cg10293903	-6.18932	6.71492e-05	0.0428855	1	170851193
cg22510139	-5.7761	6.79838e-05	0.0429992	1	3058822	PRDM16;PRDM16	Body;Body	chr1:3059050-3059268
cg12757684	-5.16466	7.00981e-05	0.0432998	6	144329485	PLAGL1;HYMAI;PLAGL1;PLAGL1;PLAGL1;PLAGL1;PLAGL1;PLAGL1;PLAGL1;PLAGL1;PLAGL1;PLAGL1;PLAGL1;PLAGL1;PLAGL1	1stExon;Body;5'UTR;5'UTR;5'UTR;1stExon;5'UTR;1stExon;1stExon;1stExon;5'UTR;5'UTR;1stExon;5'UTR;5'UTR	chr6:144328916-144329847
cg02227447	-5.51209	7.70067e-05	0.0447255	2	151919794
cg03192897	-6.53416	7.89889e-05	0.0449187	1	170115351	METTL11B	1stExon
cg08585614	-5.1149	8.0402e-05	0.0450331	13	114890416	RASA3	Body
cg23218897	-5.60331	8.21694e-05	0.0455952	17	2169522	SMG6;SMG6	TSS200;Body
cg22877366	-7.39037	8.33198e-05	0.0456978	1	12107668
cg18425341	-5.74306	8.66938e-05	0.046267	12	68056997
cg16094352	-5.28373	8.79309e-05	0.0463839	14	24642317	REC8;REC8	Body;Body	chr14:24641053-24642220
cg24545961	-8.78165	8.85211e-05	0.0465165	13	96205960	CLDN10;CLDN10;CLDN10	Body;Body;Body	chr13:96204691-96205496
cg17083209	11.2839	9.06554e-05	0.0467967	1	82274574	LPHN2	5'UTR
cg04457481	-5.25215	9.28107e-05	0.0471764	20	57426835	GNAS;GNAS;GNAS;GNASAS	TSS1500;TSS1500;3'UTR;TSS1500	chr20:57426729-57427047
cg14474319	-6.14872	9.41767e-05	0.0475879	7	83104863	SEMA3E;SEMA3E	Body;Body
cg09226288	-5.24923	9.51065e-05	0.0477279	22	51225561	RPL23AP82;RPL23AP82	Body;Body	chr22:51221772-51222317
cg04089788	-8.64417	9.62314e-05	0.0478422	22	50738890	PLXNB2	5'UTR	chr22:50737809-50738961
cg14739437	5.28649	9.58983e-05	0.0478422	8	145748548	LRRC24;LRRC14	Body;3'UTR	chr8:145747509-145748682
cg08526401	-6.84574	9.75039e-05	0.047992	11	82808301
cg22502459	-6.53725	9.75619e-05	0.047992	8	141108998	TRAPPC9;TRAPPC9	Body;Body	chr8:141107837-141110984
cg24391460	6.49195	9.89813e-05	0.0481377	7	79084166	MAGI2	TSS1500	chr7:79082174-79082427
cg08912860	-5.50344	0.000101608	0.0483722	12	132863782	GALNT9	Body	chr12:132865236-132865506
cg26053066	-5.24093	0.000101798	0.0483722	9	96080065	WNK2	Body	chr9:96080113-96080330
cg26193023	-6.36316	0.000104919	0.0487663	17	30669492	C17orf75	TSS1500	chr17:30669000-30669287
cg14093252	-5.56623	0.000105964	0.0490521	5	9835751	LOC285692	Body
cg00661523	6.0136	0.000108519	0.0495972	3	151985426	MBNL1;MBNL1;LOC401093;LOC401093	TSS1500;TSS1500;Body;Body	chr3:151986327-151987325
cg26466508	-7.50806	0.000110098	0.0499762	6	76203597	FILIP1	TSS200
cg14765818	-5.95299	0.000111613	0.050205	20	36148954	BLCAP;BLCAP;BLCAP;BLCAP;NNAT;NNAT;BLCAP	5'UTR;5'UTR;5'UTR;5'UTR;TSS1500;TSS1500;5'UTR	chr20:36148603-36150136
cg08273169	-6.78321	0.000112657	0.0502137	8	144255650
cg17921548	-5.70207	0.000116587	0.0506962	5	143678450	KCTD16	Body
cg02458846	-6.13834	0.000117963	0.0507603	5	106440547
cg03083228	-6.52149	0.000120618	0.0511041	11	43660436
cg10312186	-9.48335	0.000122131	0.0512938	6	170403583			chr6:170401900-170402500
cg13681954	5.38709	0.000123529	0.0514139	2	122656302
cg18764943	-9.30581	0.000124127	0.0514183	22	20905556	MED15;MED15;MED15;MED15;MED15;MED15	Body;Body;Body;Body;Body;Body
cg22058664	-5.65712	0.00012458	0.051489	2	54598593
cg09663343	-7.27846	0.000128791	0.0517782	11	15363270
cg10514093	-7.00499	0.000129249	0.0517782	5	156277587	PPP1R2P3	Body	chr5:156277302-156277685
cg06646708	-5.97841	0.000134131	0.0523874	6	18123224	NHLRC1	TSS1500	chr6:18122250-18122994
cg04351607	-10.6156	0.000141714	0.0533592	2	181276670
cg22537656	-8.44912	0.000147971	0.0539082	6	27706246
cg26561526	-5.73217	0.000149331	0.054058	14	23623823	SLC7A8;SLC7A8;SLC7A8;SLC7A8;SLC7A8	TSS200;TSS200;Body;Body;Body
cg24181914	-6.48396	0.000149508	0.0540934	19	47617301	ZC3H4	TSS1500	chr19:47615253-47617101
cg23354353	-5.73172	0.000157875	0.0549	10	3185197	PITRM1-AS1;PITRM1;PITRM1;PITRM1	Body;Body;Body;Body
cg04971991	-5.72427	0.000162433	0.0549	9	17824361
cg05131526	-5.5205	0.000162532	0.0549	15	91447195	MAN2A2	TSS1500	chr15:91445563-91446768
cg02219360	-6.54168	0.000166884	0.0554723	11	2721409	KCNQ1OT1;KCNQ1;KCNQ1	TSS200;Body;Body	chr11:2720410-2722087
cg18479173	-5.93088	0.000192216	0.0576296	11	33397153			chr11:33397607-33398494
cg07142010	7.57791	0.000197468	0.0579845	1	21901166	ALPL;ALPL	Body;Body
cg03991592	-6.86294	0.000198989	0.0582019	16	303192	ITFG3	5'UTR
cg01534125	-5.60942	0.000202099	0.0583675	1	231155818	MIR1182;FAM89A	TSS200;Body
cg02250764	-5.94331	0.000202809	0.0584837	5	134878149			chr5:134879443-134879819
cg08727218	-6.96429	0.000212654	0.0595664	6	87832318			chr6:87832219-87832610
cg12500876	-5.98832	0.000213917	0.0596163	15	101549236	LRRK1	Body	chr15:101548675-101548898
cg22650569	-6.36034	0.000218509	0.0600125	18	26121656
cg23985941	7.24268	0.000221474	0.0601783	14	105266545	ZBTB42	TSS1500	chr14:105266444-105267838
cg22220710	-8.97784	0.000223537	0.0603077	18	7011217	LAMA1	Body	chr18:7011267-7011488
cg11839682	-7.12241	0.000260059	0.0624325	12	131196465			chr12:131199824-131200157
cg19332572	-7.00938	0.000260708	0.0624325	11	65321591	LTBP3;LTBP3;LTBP3	Body;Body;Body	chr11:65321225-65321823
cg20149168	-6.50547	0.000263889	0.0626467	1	68512807	DIRAS3	Body	chr1:68512643-68513005
cg04734587	-7.48339	0.000269684	0.0630312	5	13810143	DNAH5	Body	chr5:13810126-13810333
cg15850249	-6.83482	0.000274423	0.0634113	17	21436506	C17orf51	3'UTR
cg06978355	-7.69903	0.000287866	0.0640497	8	6537414	MCPH1-AS1	Body
cg08319194	-6.57307	0.000293529	0.0644918	20	62451390	ZBTB46-AS1	Body
cg08000731	-8.21632	0.00029703	0.0646876	11	316247			chr11:315739-316539
cg07511671	-7.72446	0.000326854	0.066612	21	36259694	RUNX1;RUNX1;RUNX1;RUNX1;RUNX1	1stExon;1stExon;5'UTR;5'UTR;Body	chr21:36258952-36259472
cg25394782	-6.8825	0.000331733	0.066738	6	168785355
cg06779553	-6.23309	0.000331199	0.066738	8	60020513	TOX	Body
cg08229366	-8.95696	0.000337827	0.0670601	7	130130747	MESTIT1;MEST;MEST;MEST	Body;TSS1500;5'UTR;TSS1500	chr7:130130739-130133111
cg17916432	-6.74982	0.000343541	0.0674618	2	208989209	CRYGD;CRYGD	1stExon;5'UTR	chr2:208988834-208989269
cg02058483	-6.89683	0.000358875	0.0681334	11	35442918			chr11:35440375-35441882
cg00715696	-10.4688	0.000361859	0.0683406	16	85660534	KIAA0182;KIAA0182	5'UTR;Body	chr16:85658742-85658998
cg00454719	-6.10975	0.000372694	0.0688363	13	37453500	SMAD9;SMAD9	Body;Body
cg07236114	-6.53275	0.000420629	0.0715243	11	84254533	DLG2;DLG2	Body;Body
cg18951390	-7.12028	0.000432862	0.0719032	17	78735268	RPTOR;RPTOR	Body;Body
cg13796381	7.1434	0.000436298	0.0720175	9	139872395	PTGDS	Body	chr9:139872237-139873143
cg26371327	-8.92617	0.000454657	0.0726162	1	16473143	EPHA2	Body	chr1:16475111-16475324
cg01369220	-6.54208	0.000482957	0.0738871	5	140248564	PCDHA7;PCDHA6;PCDHA11;PCDHA11;PCDHA10;PCDHA4;PCDHA11;PCDHA8;PCDHA6;PCDHA1;PCDHA2;PCDHA1;PCDHA9;PCDHA11;PCDHA5;PCDHA3;PCDHA10	Body;Body;1stExon;1stExon;Body;Body;5'UTR;Body;Body;Body;Body;Body;Body;5'UTR;Body;Body;Body	chr5:140248789-140249140
cg14950044	-6.42527	0.000536215	0.0757948	20	49457327	BCAS4;BCAS4;BCAS4	Body;Body;Body	chr20:49457137-49457342
cg02634341	-7.08491	0.000557775	0.0765536	1	179711583	FAM163A	TSS1500	chr1:179711947-179713951
cg07690127	-6.98678	0.000569244	0.0768824	7	2077293	MAD1L1;MAD1L1;MAD1L1	Body;Body;Body
cg26969197	-6.65134	0.000594534	0.0775911	8	65485770			chr8:65488536-65489116
cg24059708	-9.57017	0.000611397	0.0782028	10	57170612
cg13798436	-6.59185	0.000645631	0.0793159	1	210358552
cg10919388	-6.47253	0.000685908	0.080528	14	61083163
cg10963061	-7.30958	0.000754637	0.0822724	1	158147729			chr1:158147433-158147854
cg17623793	-7.65346	0.000808749	0.0832717	5	4230872
cg17177602	-6.45198	0.000843884	0.0841437	1	1196457	UBE2J2;UBE2J2;LOC100128842;UBE2J2;UBE2J2	Body;Body;Body;Body;Body
cg22407789	-8.64236	0.000854708	0.0845494	5	18746288
cg01894614	-6.5328	0.000872706	0.0847777	18	67565361	CD226;CD226;CD226	Body;Body;5'UTR
cg13297560	-9.92062	0.0010779	0.0903994	15	99320054	IGF1R	Body
cg19093370	-10.755	0.00107882	0.0904435	17	17110180	PLD6	TSS1500	chr17:17109893-17110296
cg10203211	-8.28115	0.00113429	0.0914306	4	185018682	ENPP6	Body	chr4:185018390-185018721
cg11031278	6.8192	0.00119188	0.0927134	11	113929114	ZBTB16	TSS1500	chr11:113929633-113932190
cg12088050	-7.15237	0.00119392	0.0927723	9	130854132	SLC25A25;SLC25A25;SLC25A25;SLC25A25;SLC25A25	5'UTR;5'UTR;1stExon;1stExon;Body
cg25035485	-7.58349	0.00127473	0.0945768	2	21266500	APOB	Body	chr2:21266669-21266961
cg25162533	-7.17496	0.00147918	0.0983371	17	81032067			chr17:81032582-81032959
cg27279301	-7.32258	0.00202422	0.107115	14	105945287	CRIP2	Body	chr14:105944421-105945700

## Sheet: S3 DMRs
seqnames	start	end	width	strand	no.cpgs	min_smoothed_fdr	Stouffer	HMFDR	Fisher	maxdiff	meandiff	overlapping.genes	CpG Islands (UCSC)
chr7	27182493	27185512	3020	*	36	2.23772e-124	2.01994e-38	0.00118698	5.63993e-35	-0.204221	-0.108236	HOXA-AS3, HOXA3, RP1-170O19.22, HOXA5, HOXA6	CpG Island
chr17	79374327	79375254	928	*	5	3.03762e-56	1.3465e-13	8.03191e-07	1.35414e-17	-0.19659	-0.115782	RP11-1055B8.6, RP11-1055B8.7, MIR4740	CpG Island
